# Supplementary material
Source: Springer Nature journal article supplement (https://www.springermedizin.de/resource/supplementary/13046_2010_355_MOESM2_ESM.pdf/9661840)

**A**0 $\mu$ M (3.5 $\pm$ 0.7)%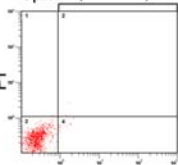

Annexin-V FITC

5 $\mu$ M (24.7 $\pm$ 6.2)%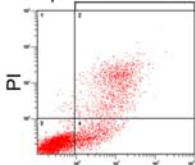

Annexin-V FITC

7.5 $\mu$ M (32.7 $\pm$ 6.8)%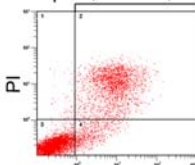

Annexin-V FITC

10 $\mu$ M (40.2 $\pm$ 5.9)%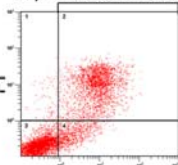

Annexin-V FITC

15 $\mu$ M (57.3 $\pm$ 5.6)%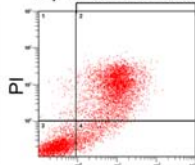

Annexin-V FITC

20 $\mu$ M (78.1 $\pm$ 6.5)%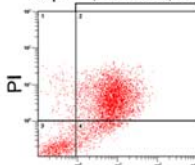

Annexin-V FITC

**B**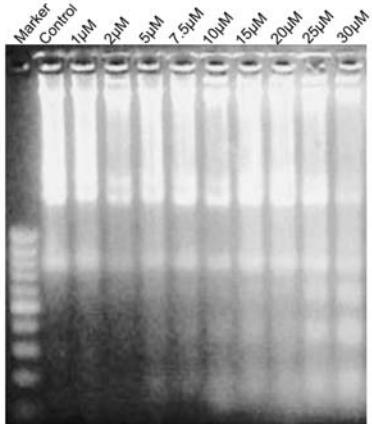

Supplement: MOESM2 [file 9661840]
